# Supplementary material for: An enzymatic biosensor for hydrogen peroxide based on one-pot preparation of CeO2-reduced graphene oxide nanocomposite
Source: Royal Society of Chemistry journal article supplement (doi:10.1039/c4ra12841a), 2015-01-01
Supplement: c4ra12841a1.pdf [file c4ra12841a1.pdf]

**Supporting Information**

**An enzymatic biosensor for hydrogen peroxide based on one-pot preparation of  
CeO<sub>2</sub>-reduced graphene oxide nanocomposite**

**Sivaprakasam Radhakrishnan, Sang Jae Kim\***

*Nanomaterials and System Lab, Department of Mechatronics Engineering, Jeju National University,  
Jeju 690-756, Republic of Korea.*

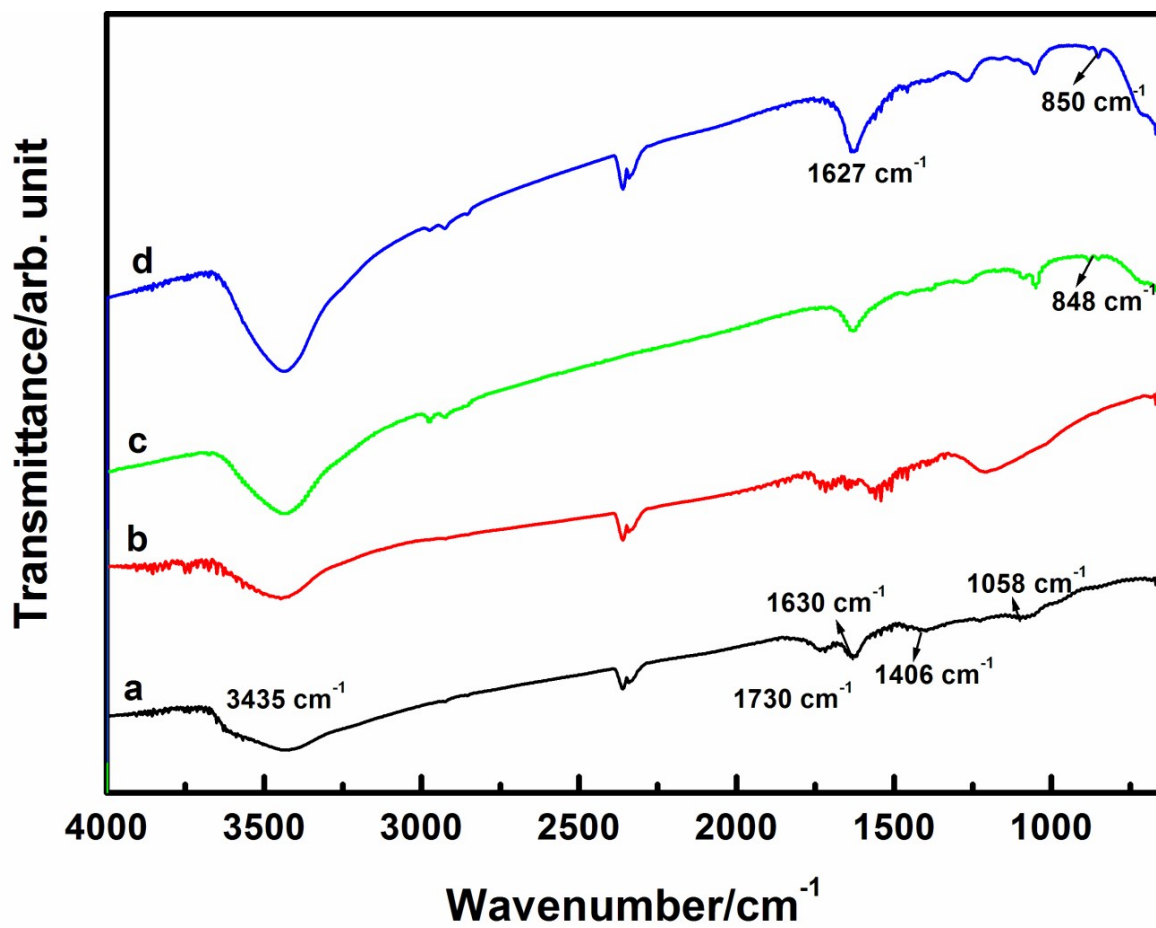

Fig. S1 FT-IR spectra of (a) GO, (b) rGO, (c) CeO<sub>2</sub>-rGO and (d) CeO<sub>2</sub>.

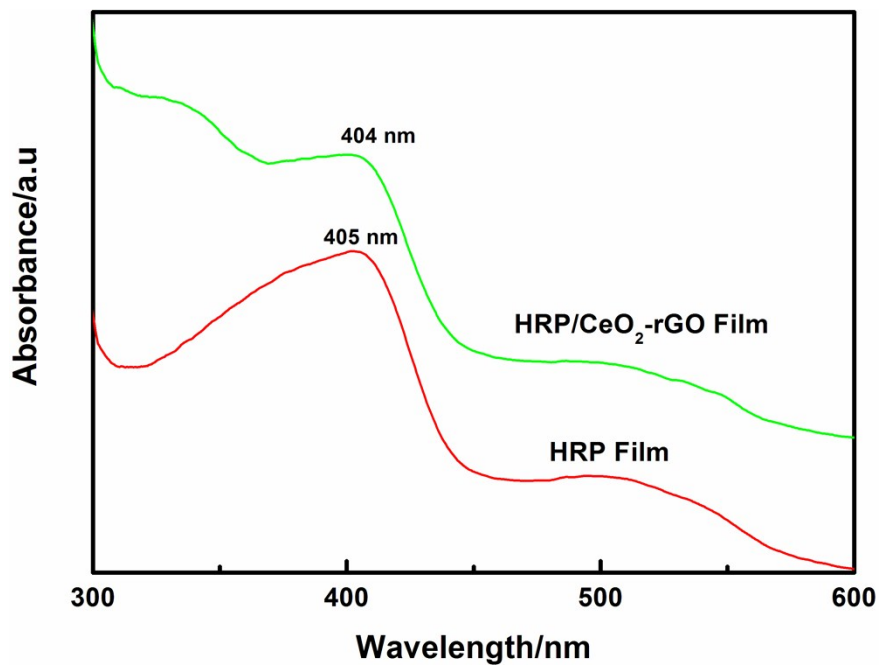

Fig. S2 UV-vis spectra of HRP and HRP/CeO<sub>2</sub>-rGO film on quartz slides at room temperature.

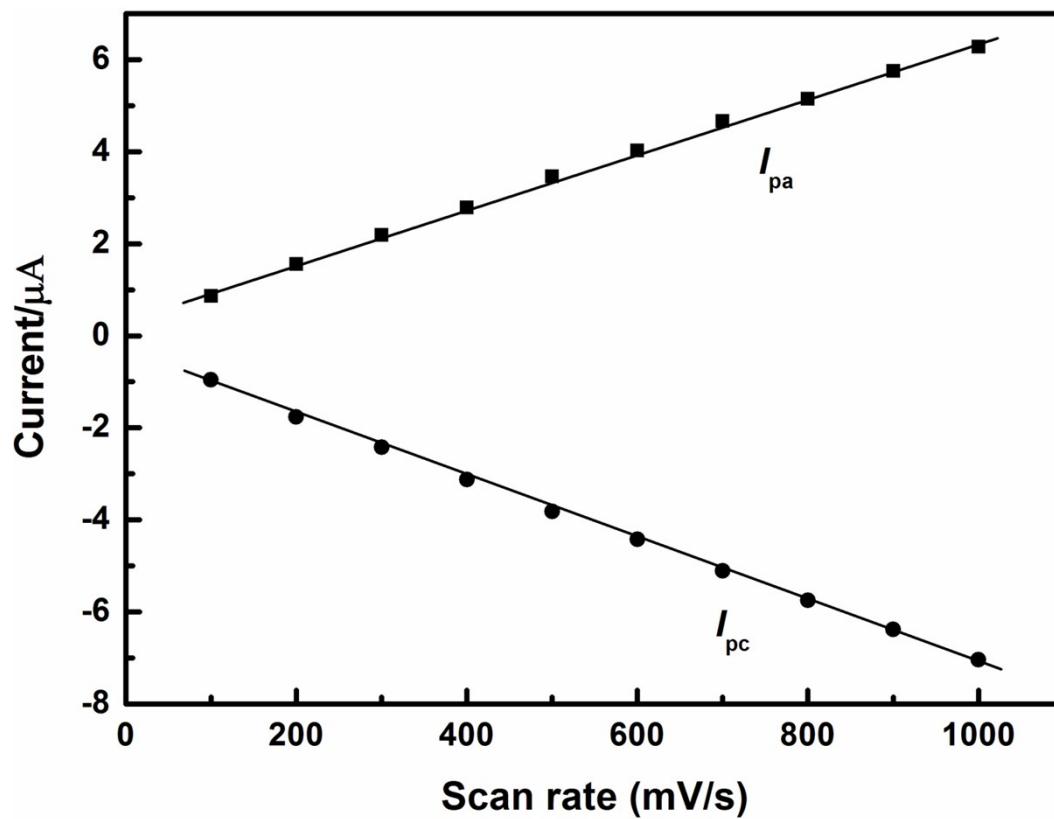

**Fig. S3** Plot of peak current as a function of scan rates for HRP/CeO<sub>2</sub>-rGO modified GC electrode in PB solution (pH 7.0).

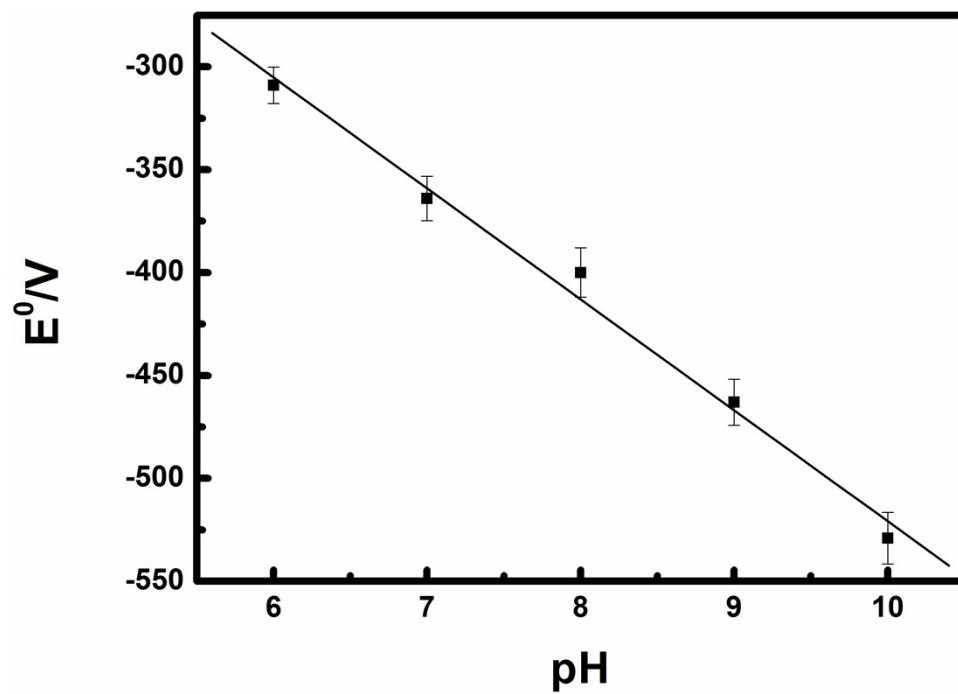

**Fig. S4** Plot of formal potential vs. pH for HRP/CeO<sub>2</sub>-rGO modified GC electrodes in 0.1 M PB solution (pH 7.0) at scan rate 100 mV/s.

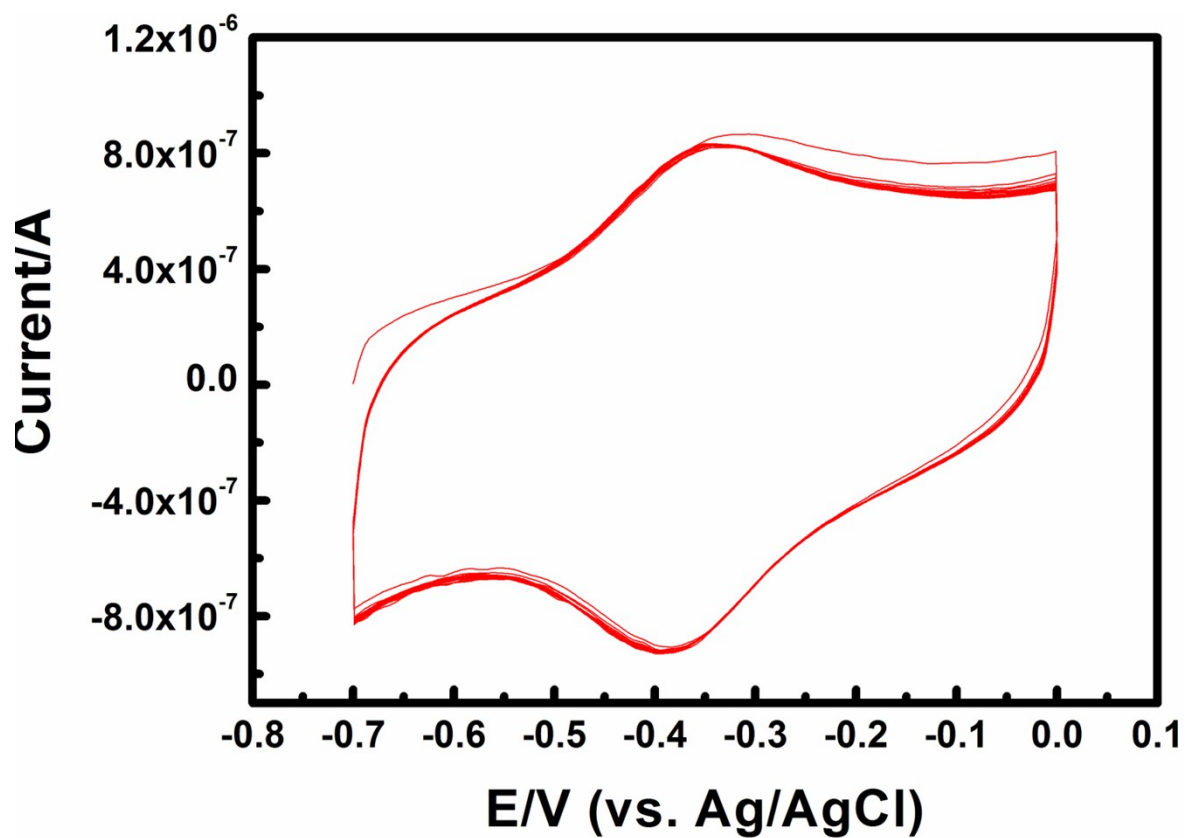

**Fig. S5** CVs stability of HRP/CeO<sub>2</sub>-rGO modified GC electrode in PB solution (pH 7.0) at a scan rate of 100 mV/s for 20 continuous cycles in the potential window between -0.7 to 0 V.

**Table-S1 Comparison of the responses of other H<sub>2</sub>O<sub>2</sub> sensors**

| Electrode materials                                    | Detection limit ( $\mu\text{M}$ ) | Linear range ( $\mu\text{M}$ ) | $K^{\text{M}}_{\text{app}}$ (mM) | Ref.      |
|--------------------------------------------------------|-----------------------------------|--------------------------------|----------------------------------|-----------|
| Hb <sup>a</sup> -CNDs <sup>b</sup> -CS <sup>c</sup>    | 0.27                              | 1.0–118                        | 0.067                            | [1]       |
| HGN <sup>d</sup> -HRP <sup>e</sup> -MB                 | 0.5                               | 0.5–500                        | -                                | [2]       |
| CS/HRP-PTBA                                            | 0.1                               | 1–300                          | 0.13                             | [3]       |
| HRP-Ag@C                                               | 0.2                               | 0.5–140                        | 0.03                             | [4]       |
| HRP <sup>a</sup> /PTBA <sup>f</sup> -RTIL <sup>g</sup> | 0.5                               | 5.0 – 175                      | 1.22                             | [5]       |
| HRP/TiO <sub>2</sub> nanorod                           | 0.2                               | 0.8 – 35                       | 0.033                            | [6]       |
| Hb/Graphene/CS                                         | 0.51                              | 6.5 – 230                      | 0.344                            | [7]       |
| HRP/CeO <sub>2</sub> -rGO                              | 0.021                             | 0.1–500                        | 0.011                            | This work |

<sup>a</sup>Hemoglobin

<sup>b</sup>Carbon nanodots

<sup>c</sup> chitosan

<sup>d</sup>hollow graphitic nanocapsule

<sup>e</sup> horseradish peroxidase

<sup>f</sup> poly (thiophene-3-boronic acid

<sup>g</sup>room temperature ionic liquids

## References

- [1] Sheng, M., Gao, Y., Sun, J., Gao, G., *Biosens. Bioelectron* 58, 2014, 351-358.
- [2] Liu W.N., Ding D., Song Z.L., Bian X., Nie X.K., Zhang X.B., Chen Z. and Tan W., *Biosens. Bioelectron.* 52, 2014, 438–444.
- [3] Huang Y., Wang W., Li Z., Qin X., Bu L., Tang Z., Fu Y., Ma M., Xie Q., Yao S. and Hu J., *Biosens. Bioelectron.* 44, 2013, 41–47.
- [4] Mao S., Long Y., Li W., Tu Y. and Deng A., *Biosens. Bioelectron.* 48, 2013, 258–262.
- [5] Cui, L., Xu, M., Zhu, J., Ai, S., 2011. *Syn. Metal.* 161, 1686-1690.
- [6] Liu, J., Li, Y., Huang, X., 2010. *Nanoscale Res. Lett.* 5, 1177-1181.
- [7] Xu, H., Dai, H., Chen, G., 2010. *Talanta*, 81, 334-338.
